# Supplementary material
Source: PubMed Central journal article supplement (PMC5361595)

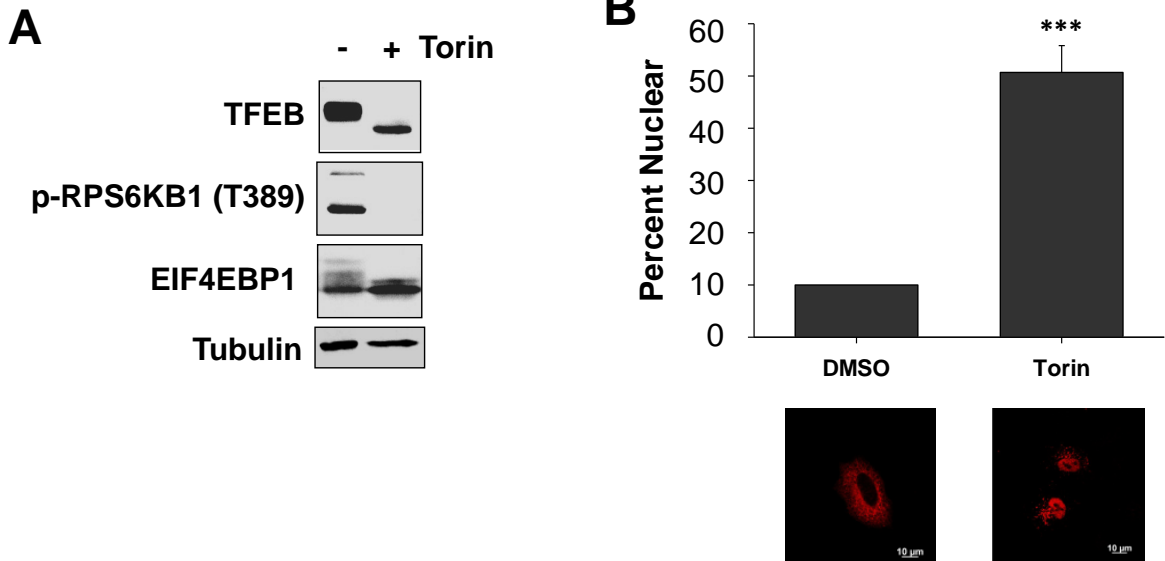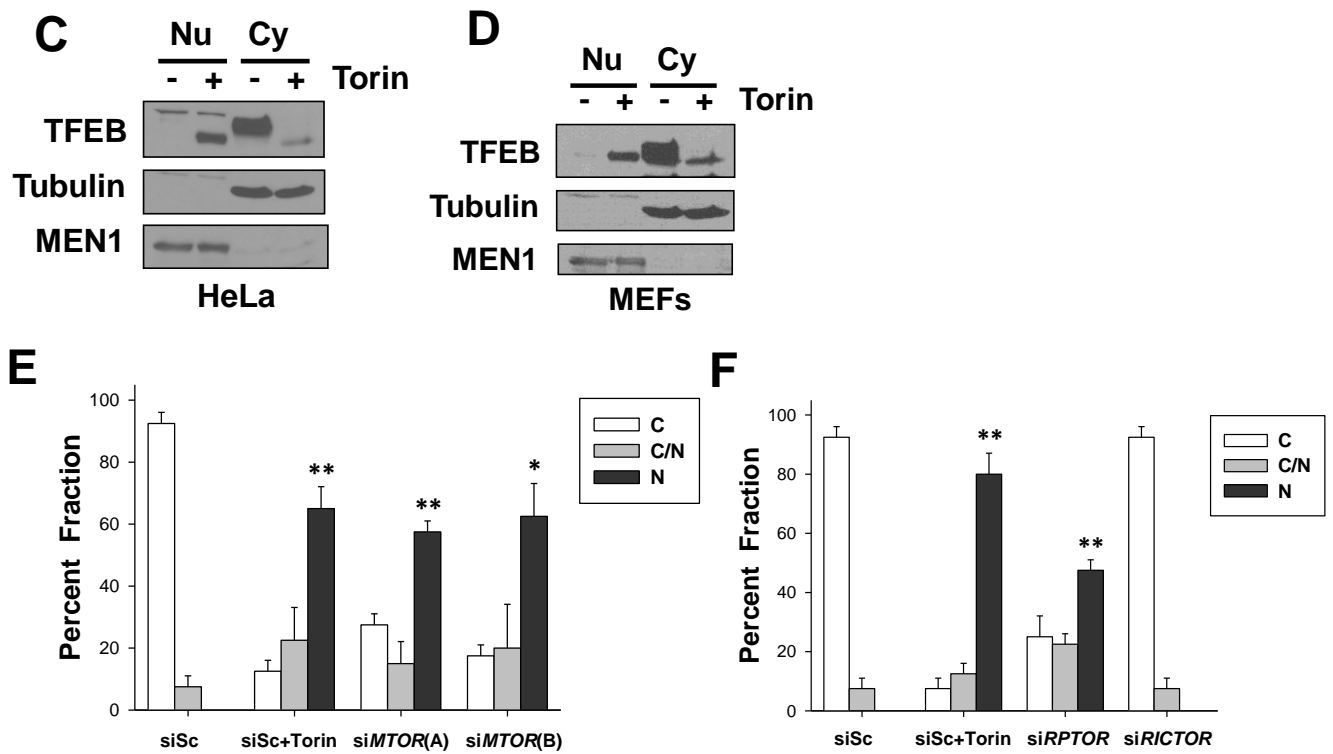

**A**

|                                                       |       |     |                  |                  |       |             |
|-------------------------------------------------------|-------|-----|------------------|------------------|-------|-------------|
|                                                       | (118) | 118 | *                | 130              | 140   | 156         |
| TFEB <i>Homo sapiens</i> (NP_001258874.1)             | (118) | P   | --               | PAASPGVRAGHVLSSS | ----- | AGNSAPNSPMA |
| TFEB <i>Macaca mulatta</i> (NP_001253249.1)           | (118) | P   | --               | PAASPGVRAGHVLSSS | ----- | AGNSAPNSPMA |
| TFEB <i>Canis lupus familiaris</i> (XP_005627385)     | (115) | L   | --               | PAASPGVRAGHVMSSS | ----- | AGNSAPNSPMA |
| TFEB <i>Bos taurus</i> (NP_001192595.1)               | (118) | L   | --               | PAASPGVRPAHVLSSS | ----- | AGNSAPNSPMA |
| TFEB <i>Mus musculus</i> (NP_001155194)               | (117) | A   | --               | PAASPGVRAGHVLST  | ----- | AGNSAPNSPMA |
| TFEB <i>Rattus norvegicus</i> (XP_006244508.1)        | (118) | P   | --               | PAASPGVRAGHVLST  | ----- | AGNSAPNSPMA |
| TFEB <i>Ornithorhynchus anatinus</i> (XP_001511884.1) | (115) | P   | --               | PAASPGGRPGVLPSS  | ----- | AGNSTPNSPMA |
| TFEB <i>Danio rerio</i> (NP_001244121.1)              | (114) | P   | PMVQAQTGSAPPNMHS | PCMRTEQLMNS      |       | AGNSAPNSPMA |

**B**

|                                           |       |     |              |        |          |                 |               |
|-------------------------------------------|-------|-----|--------------|--------|----------|-----------------|---------------|
|                                           | (103) | 103 | 110          | 120    | *130     | 140             | 153           |
| TFEB <i>Homo sapiens</i> (NP_001258874.1) | (96)  | LSE | TYGNKFAAHI   | SPAQGS | PKKPP    | PAASPGVRAGHVLSS | SAGNSAPNSPMA  |
| TFE3 <i>Homo sapiens</i> (NP_001269071.1) | (98)  | LST | TLGPKLASQALT | P---   | PPGEASAQ | PLPAPFAAHTT     | GPTGSAPNSPMA  |
| MITF <i>Homo sapiens</i> (NP_000239.1)    | (36)  | LST | TLANKHANQVLS | L---   | ---      | PCPNQPGDHVMP    | PPVPGSAPNSPMA |

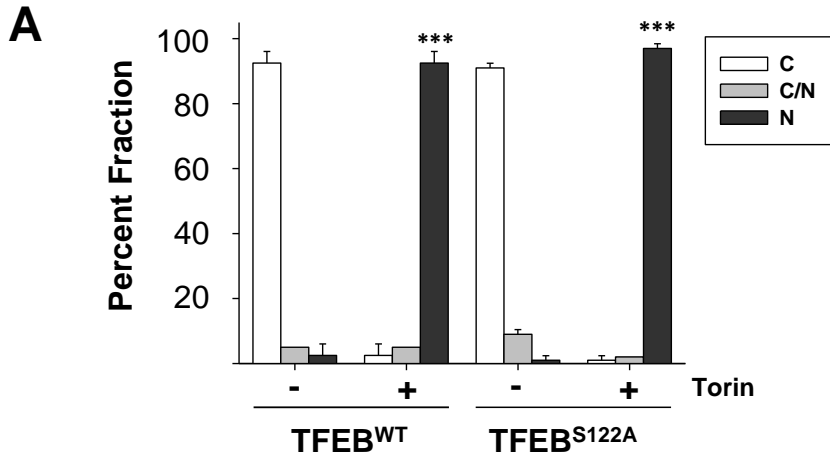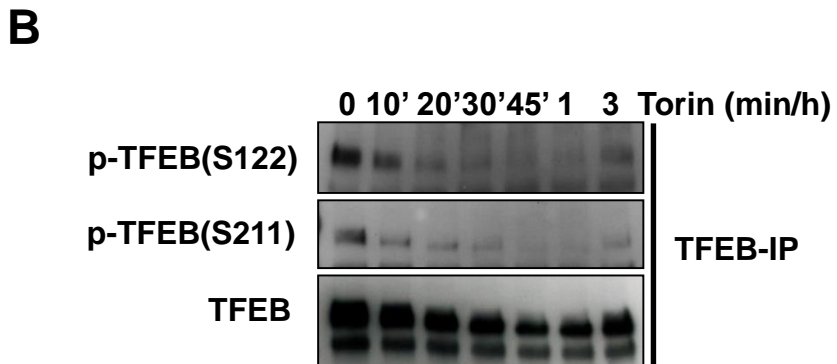

Supplement: kaup-13-03-1271514-s001.pdf [file kaup-13-03-1271514-s001.pdf]
